# Supplementary material for: Synthesis and kinetic behaviour of lanthanide(III) complexes with the mixed pendant-arm macrocyclic ligand 1,7-bis(carboxymethyl)-4,10-bis(1-methylimidazol-2-ylmethyl)-1,4,7,10-tetraazacyclododecane†
Source: Royal Society of Chemistry journal article supplement (doi:10.1039/b101874o), 2001-01-01
Supplement: b101874o.doc [file b101874o.doc]

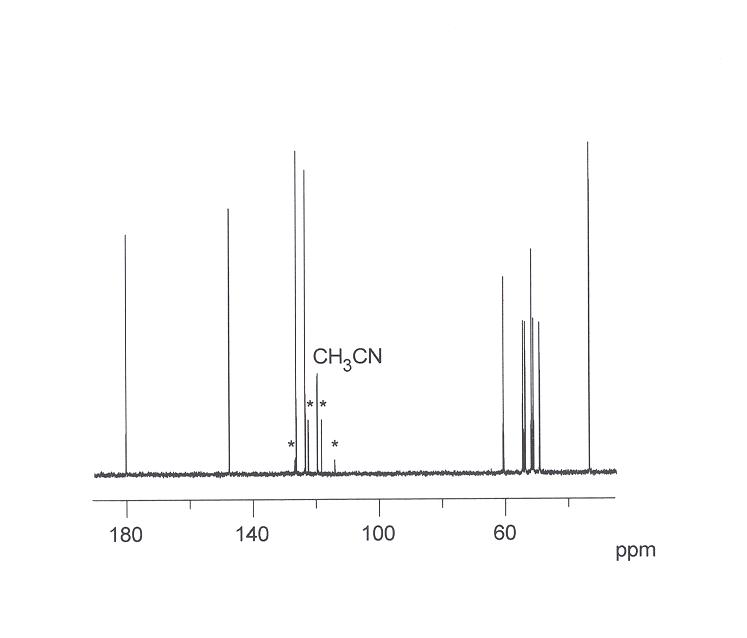


13C1H spectrum of the [LaL]+ cation at 278 K in D2O. * Signals due to the trifluoro-methansulfonate.


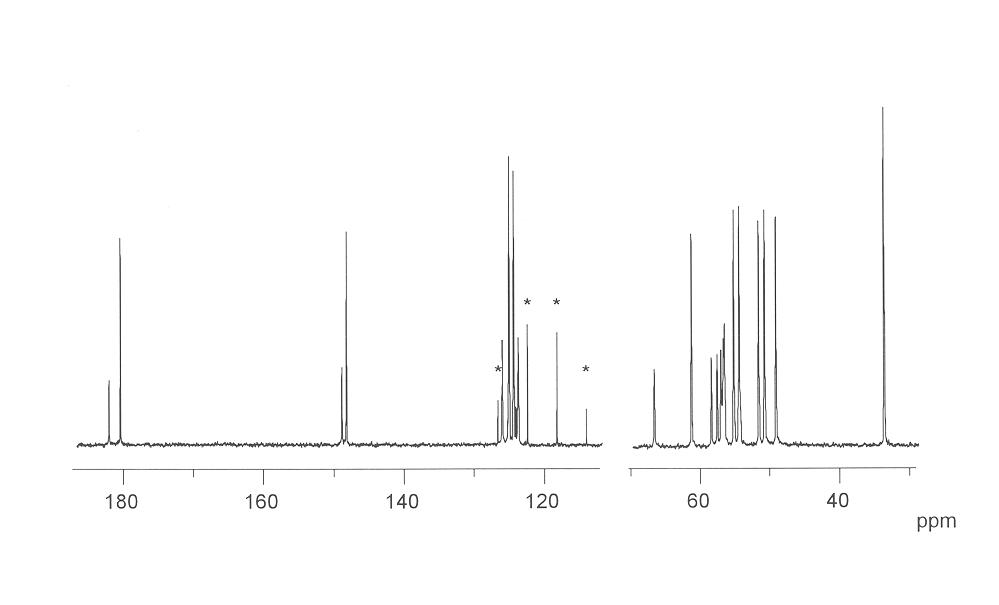


13C1H spectrum of the [LuL]+ cation at 272 K in D2O. * Signals due to the trifluoromethansulfonate.


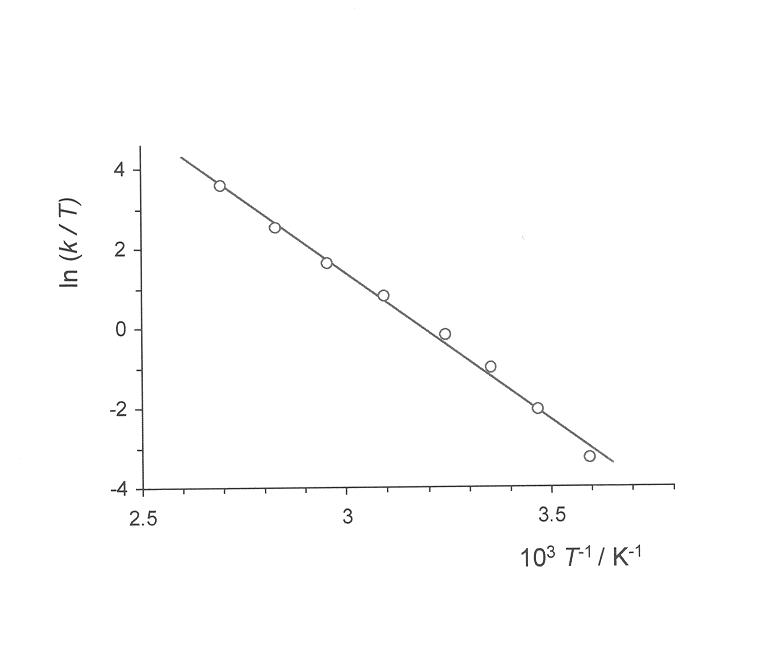


Eyring plot for the ring inversion of the [LaL]+ cation in D2O.
